# Supplementary material for: A machine learning approach for viral genome classification
Source: PubMed Central journal article supplement (PMC5387389; doi:10.1186/s12859-017-1602-3), 2017-04-11
Supplement: 12859_2017_1602_MOESM1_ESM.pdf [file 12859_2017_1602_MOESM1_ESM.pdf]

ADDITIONAL FILE 1

# Supplementary data: A machine learning approach for viral genome classification

Mohamed Amine Remita, Ahmed Halioui, Abou Abdallah Malick Diouara, Bruno Daigle, Golrokh Kiani and Abdoulaye Baniré Diallo\*

---

\*Correspondence: [diallo.abdoulaye@uqam.ca](mailto:diallo.abdoulaye@uqam.ca)  
Laboratoire de bioinformatique, département d'informatique, Université du Québec à Montréal, P.O. Box 8888 Downtown Station, H3C 3P8, Montreal, Qc, Canada

**Table S1 Learning algorithms.**

| Algorithm type | Algorithm              | Weka module                         | Options                                                                                                  | Acronym |
|----------------|------------------------|-------------------------------------|----------------------------------------------------------------------------------------------------------|---------|
| Symbolic       | C4.5 decision tree     | weka.classifiers.trees.J48          | -C 0.25 -M 2                                                                                             | J48     |
|                | Random forests         | weka.classifiers.trees.RandomForest | -I 10 -K 0 -S 1 -num-slots 1                                                                             | RFT     |
| Statistical    | Naive bayes            | weka.classifiers.bayes.NaiveBayes   | NaiveBayes                                                                                               | NBA     |
|                | Support vector machine | weka.classifiers.functions.LibSVM   | -S 0 -K 0 -D 3 -G 0.0 -R 0.0 -N 0.5 -M 40.0 -C 1.0 -E 0.001 -P 0.1 -model /home/hpvs/weka-3-7-10 -seed 1 | SVM     |
|                | K-nearest neighbours   | weka.classifiers.lazy.IBk           | -K \$K -W 0 -A "weka.core.neighboursearch.LinearNNSearch -A "weka.core.EuclideanDistance -R first-last"  | IBK     |
| Ensemble       | AdaBoost               | weka.classifiers.meta.AdaBoostM1    | -P 100 -S 1 -I 10 -W weka.classifiers.trees.J48 - -C 0.25 -M 2                                           | ADA     |
|                | Bagging                | weka.classifiers.meta.Bagging       | -P 100 -S 1 -num-slots 1 -I 10 -W weka.classifiers.trees.J48 - -C 0.25 -M 2                              | BAG     |

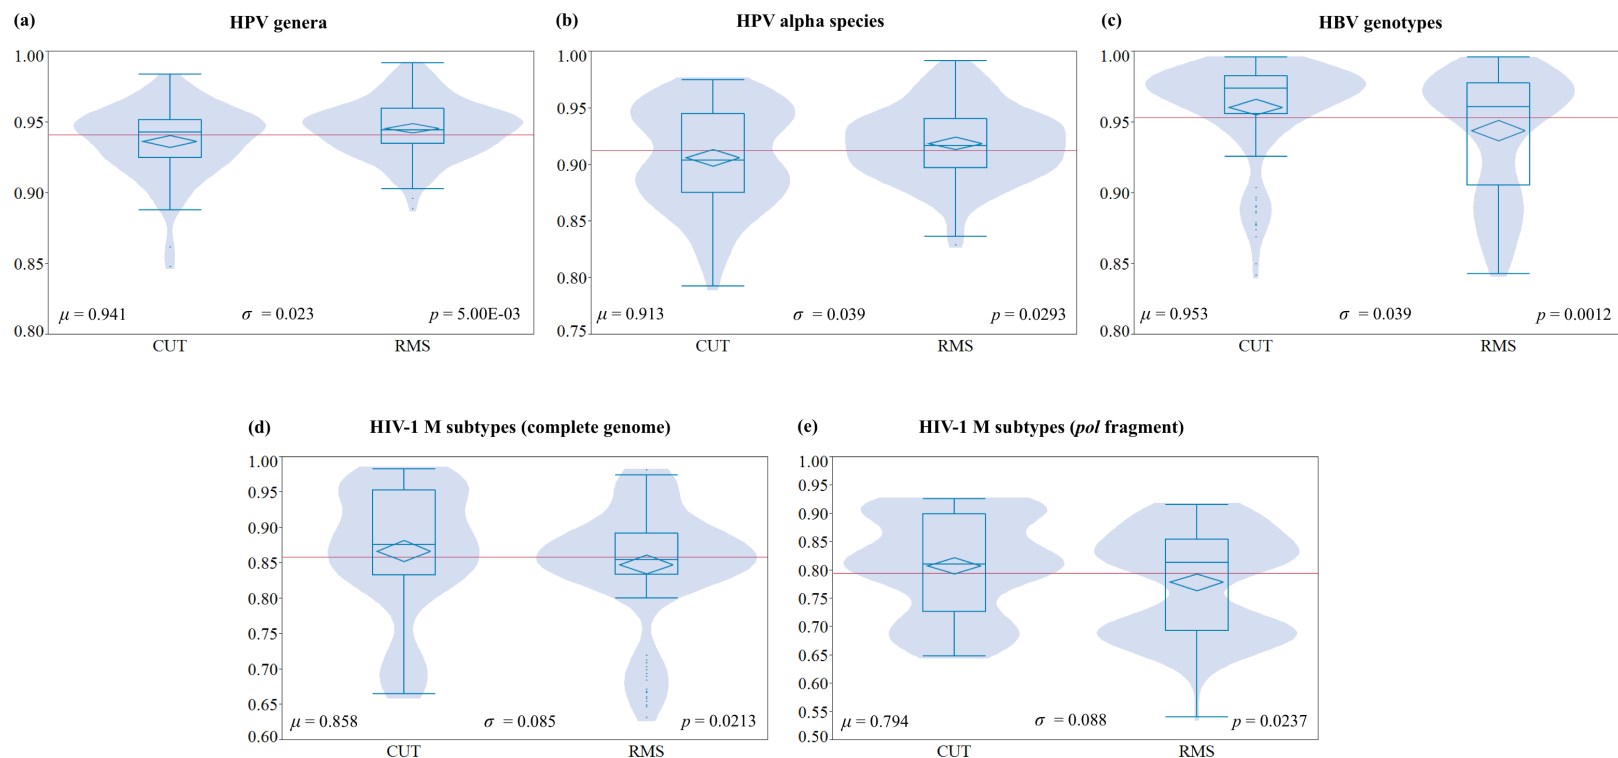

**Figure S1** Comparison of the weighted  $F$ -measure distribution according to  $CUT$  and  $RMS$  computed from the simulation study of the 280 experiments for (a) HPV genera, (b) HPV alpha species, (c) HBV genotypes, (d) HIV-1 M subtype complete genomes and (e) HIV-1 M subtype *pol* fragments.  $\mu$ ,  $\sigma$  are the mean and the standard deviation of the overall weighted  $F$ -measures.  $p$  is the  $p$ -value determining the statistical significance of the weighted  $F$ -measure mean differences among all the experiments. This  $p$ -value is computed with the Wilcoxon/Kruskal-Wallis test.

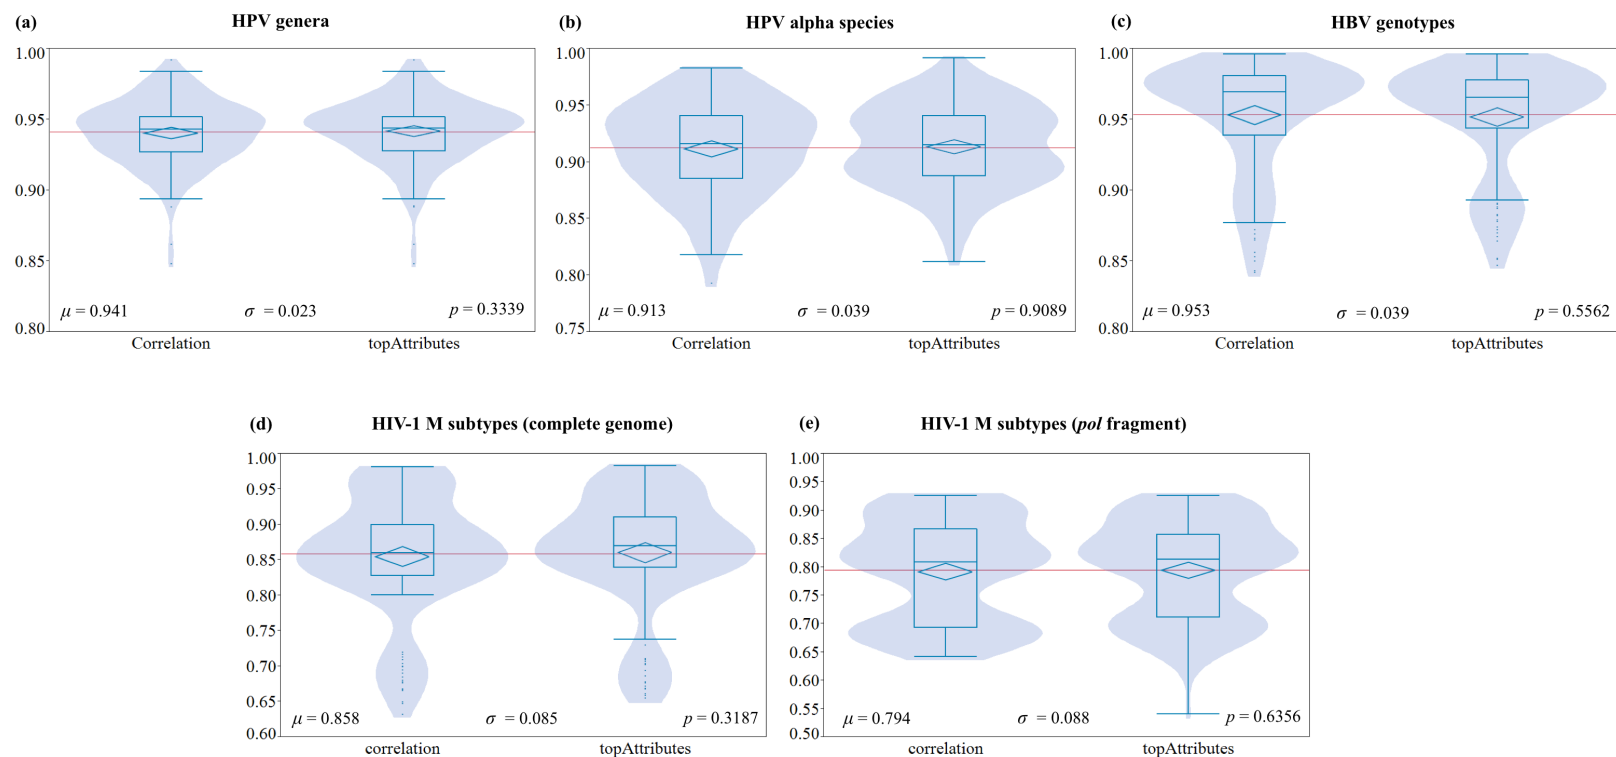

**Figure S2** Comparison of the weighted *F-measure* distribution according to *topAttributes* and *correlation* computed from the simulation study of the 280 experiments for **(a)** HPV genera, **(b)** HPV alpha species, **(c)** HBV genotypes, **(d)** HIV-1 M subtype complete genomes and **(e)** HIV-1 M subtype *pol* fragments.  $\mu$ ,  $\sigma$  are the mean and the standard deviation of the overall weighted *F-measures*.  $p$  is the *p-value* determining the statistical significance of the weighted *F-measure* mean differences among all the experiments. This *p-value* is computed with the Wilcoxon/Kruskal-Wallis test.

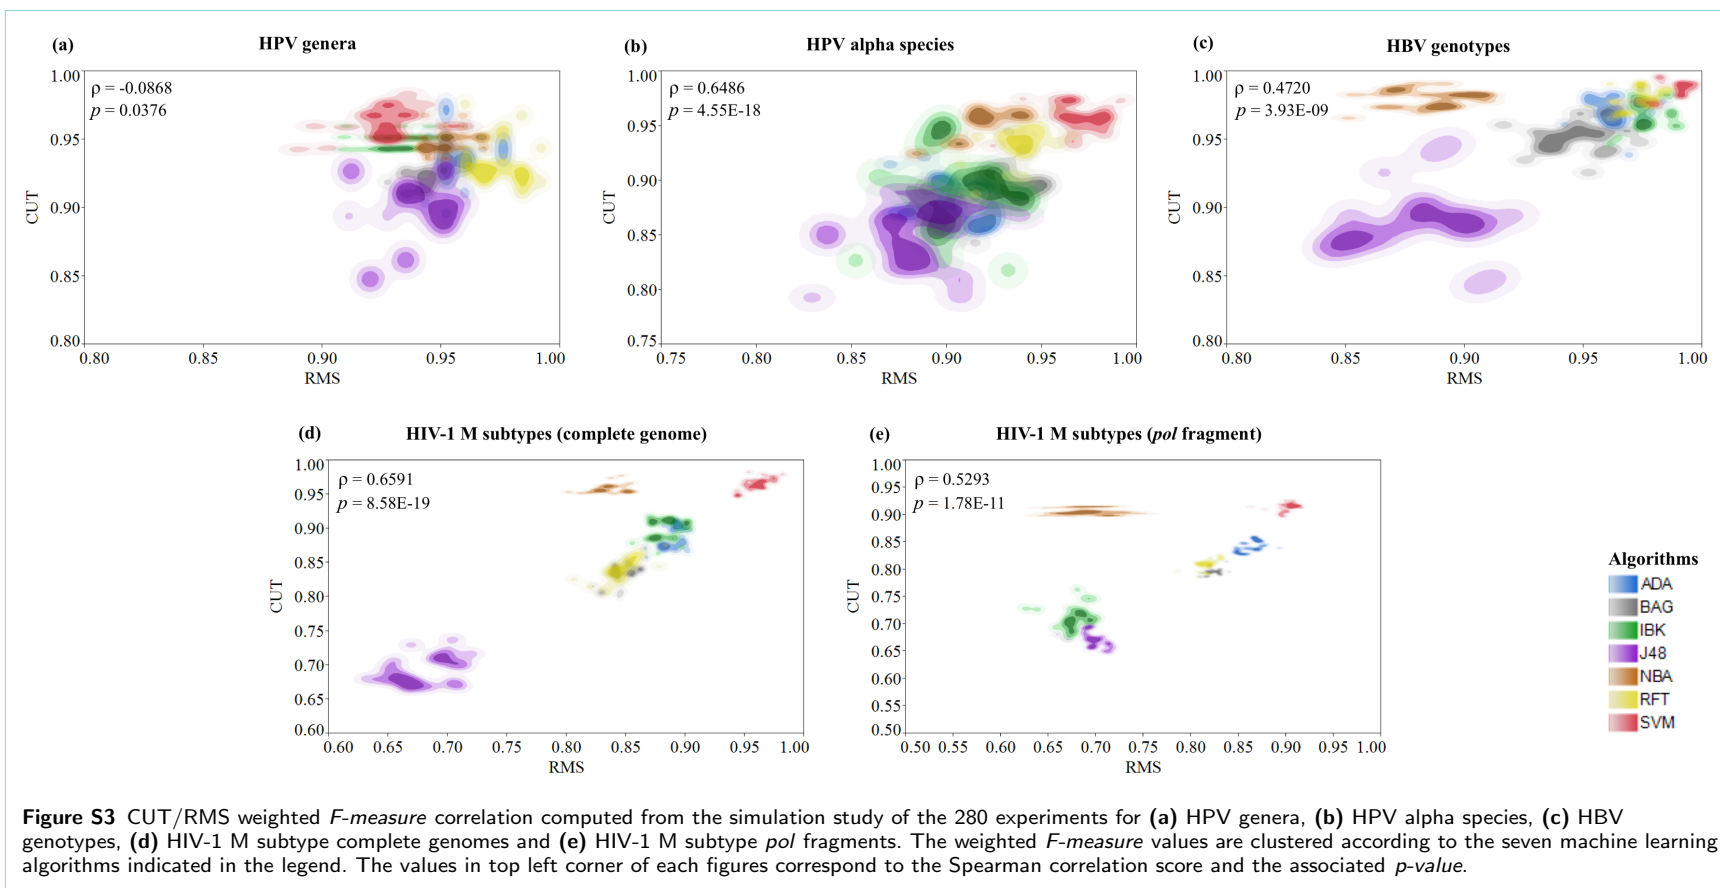

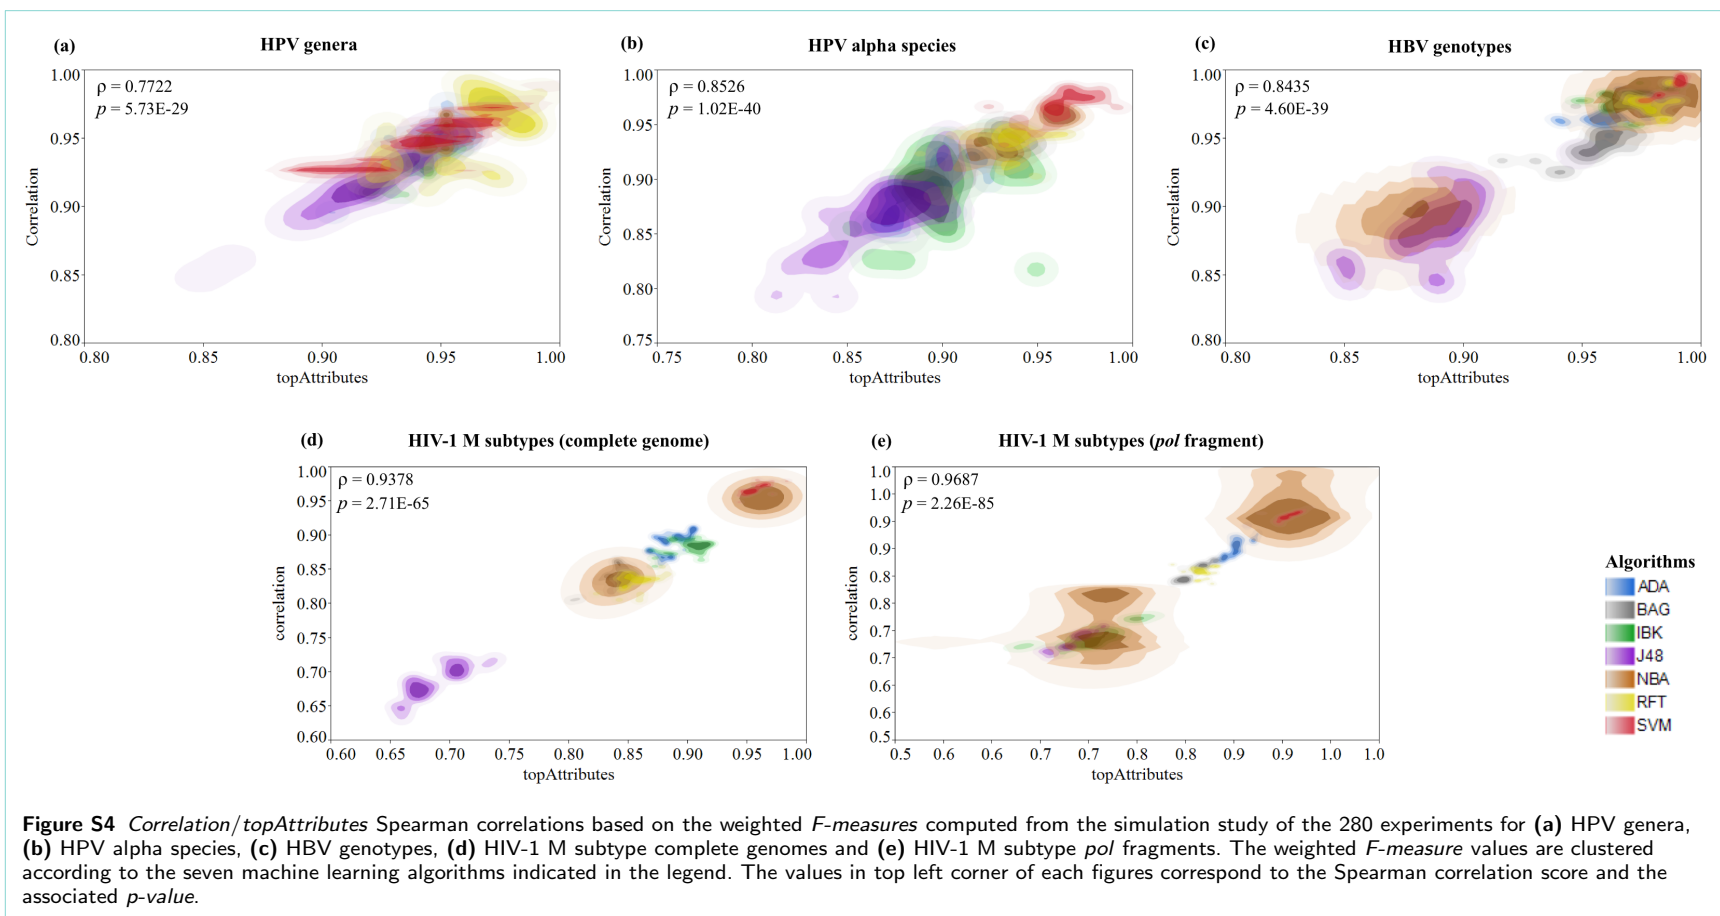

**Figure S4** Correlation/topAttributes Spearman correlations based on the weighted  $F$ -measures computed from the simulation study of the 280 experiments for (a) HPV genera, (b) HPV alpha species, (c) HBV genotypes, (d) HIV-1 M subtype complete genomes and (e) HIV-1 M subtype *pol* fragments. The weighted  $F$ -measure values are clustered according to the seven machine learning algorithms indicated in the legend. The values in top left corner of each figures correspond to the Spearman correlation score and the associated  $p$ -value.
